# Supplementary material for: Fungal glyceraldehyde 3-phosphate dehydrogenase GpdC maintains glycolytic mechanism against reactive nitrogen stress-induced damage
Source: Front Microbiol. 2024 Oct 11;15:1475567. doi: 10.3389/fmicb.2024.1475567 (PMC11502334; doi:10.3389/fmicb.2024.1475567)
Supplement: Supplementary file 2 [file Table_1.XLSX]

## Sheet: Table S1
	Table S1. Strains used in this study
	Strains	Genotype	Source
	A4	Wild-type	Obtained from FGSC
	TN02A3	pyrG89, argB2, nkuA::argB, pyroA4	Nayak et al. 2006
	NPC1	pyrG89::pyrG, argB2, nkuA::argB, pyroA4	This study
	GpdCΔ	pyrG89, argB2, nkuA::argB, pyroA4 gpdC::pyrG	This study
	PdcAΔ	pyrG89, argB2, nkuA::argB, pyroA4 pdcA::pyrG	This study
	AlcCΔ	pyrG89, argB2, nkuA::argB, pyroA4 alcC::pyrG	This study
	DldAΔ	pyrG89, argB2, nkuA::argB, pyroA4 dldA::pyrG	This study
	GpdCΔ+gpdC	pyrG89, argB2, nkuA::argB, pyroA4 gpdC::pyrG::gpdC-ptrA-pyrG	This study
	SRS29	pyroA4, pyrG89, ΔargB::trpCΔB, argB+, Pgpd::N-cit-1::gfp	Suelmann and Fischer. 2000

## Sheet: Table S2
	Table S1. Primers used in this study
	Name	Sequence	Source
	gpdC-FC	CGATCTCCGTGTACTTCTTC	This study
	gpdC-F1	CAAGGAGAAGTCGCTGAG	This study
	gpdC-R1	TCGAATTCTAGCTACCCAGGCTCGTTGATGGAAGGAGC	This study
	gpdC-F3	CTGGTAGACAAGCACTGATCCGATCGAATCGATAGAGTC	This study
	gpdC-R3	GAGGGGACGTACATCTCATC	This study
	gpdC-RC	GCTTCGAACCTACACGATC	This study
	pdcA-FC	GTCAGTCGCTGGATATAGC	This study
	pdcA-F1	GCTTTTGCTCTGGACTAGC	This study
	pdcA-R1	TCGAATTCTAGCTACCCAGGCTCCCTTGTAGCAATGTCG	This study
	pdcA-F3	CTGGTAGACAAGCACTGATCGGTTCTCTTGTTGTGATCTGAG	This study
	pdcA-R3	GTGGTAAGGGCATGATATGAG	This study
	pdcA-RC	GAGGTACCGTATGCAGATCC	This study
	dldA-FC	CTGAGTTGAAGCCACACATC	This study
	dldA-F1	GTAGAGATGATTCAGCGCG	This study
	dldA-R1	TCGAATTCTAGCTACCCAGGGTTCTCGTGCGGTTTATAGAC	This study
	dldA-F3	CTGGTAGACAAGCACTGATCCGCTACAGCAATCCATAAG	This study
	dldA-R3	GGGTCTCTAGATGAAGAACG	This study
	dldA-RC	GGCGAAGAACACAGTTACC	This study
	alcC-FC	CGCAAGACGTATAAGGGTC	This study
	alcC-F1	CAAGGAGTTAGAATCGGAGG	This study
	alcC-R1	TCGAATTCTAGCTACCCAGGCAGACATCCTTGGGATGAG	This study
	alcC-F3	CTGGTAGACAAGCACTGATCCAGGAAGCAGAAATTCACC	This study
	alcC-R3	GCCTGGTGATAATGACTGTC	This study
	alcC-RC	GGCAAGACAGATCTTGGAG	This study
	pyrG-F	CCTGGGTAGCTAGAATTCG	This study
	pyrG-R	GATCAGTGCTTGTCTACCAG	This study
	pET21a-gpdA-F	AAAACATATGATGGCTCCCAAGGTCGG	This study
	pET21a-gpdA-R	AAAAAAGCTTTTGGGCATCAACCTTGGAG	This study
	gpdC-comp-R1	CGTTGATGGAAGGAGCCATTCTGGTTTGAACTAGGTAAGGC	This study
	gpdC-comp-F2	GCCTTACCTAGTTCAAACCAGAATGGCTCCTTCCATCAACG	This study
	gpdC-comp-R2	ATGCAAGAGCGGCTCATCGTTTACTCATTATGCGCAATATG	This study
	gpdC-comp-F3	CATATTGCGCATAATGAGTAAACGATGAGCCGCTCTTGCAT	This study
	gpdC-comp-R3	CGAATTCTAGCTACCCAGGCGGGATCCCATTGGTAACGA	This study
	gpdC-comp-F4	TCGTTACCAATGGGATCCCGCCTGGGTAGCTAGAATTCG	This study
	gpdC-comp-R4	CACGAACCCGACTATCATTC	This study
	gpdC-comp-RC	GATAGGCGCAGACCTATCTC	This study
	actA-RT-F	CATGAAGGTCAAGATCATTG	This study
	actA-RT-R	GCTCTCATCGTACTCCTGC	This study
	gpdA-RT-F	CTACACTGCTACCCAGAAGG	This study
	gpdA-RT-R	CATTGAGCGAAGGAATGAC	This study
	gpdC-RT-F	GATTGATTTGACCGTCAGC	This study
	gpdC-RT-R	GTCATACCAGGCCATGATC	This study
